# Supplementary material
Source: HighWire-hosted journal article supplement (https://jitc.bmj.com/content/9/10/e003354)
Supplement: inline-supplementary-material-6 [file inline-supplementary-material-6.pdf]

## Isolated CD8+ cells

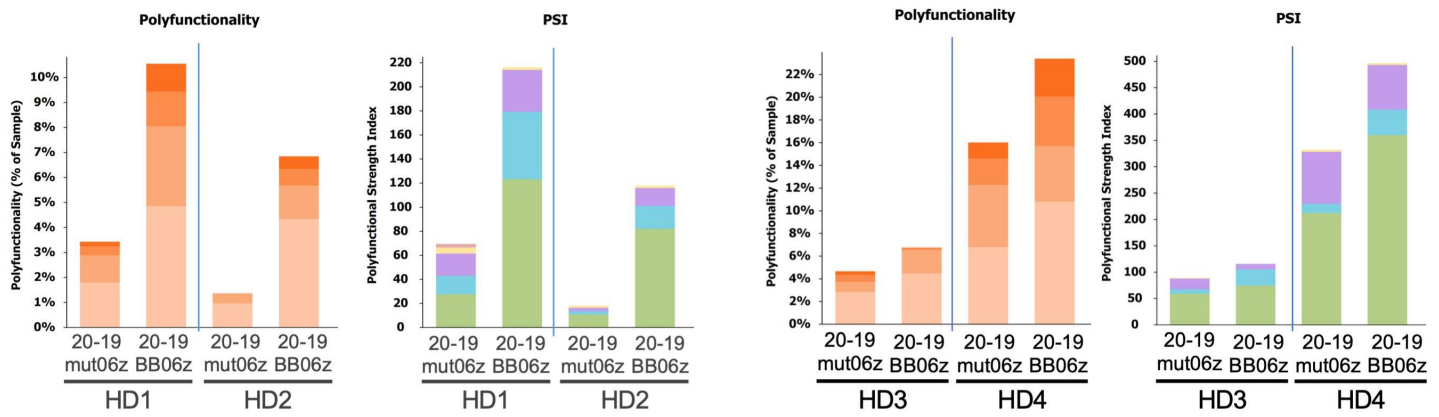

## Isolated CD4+ cells

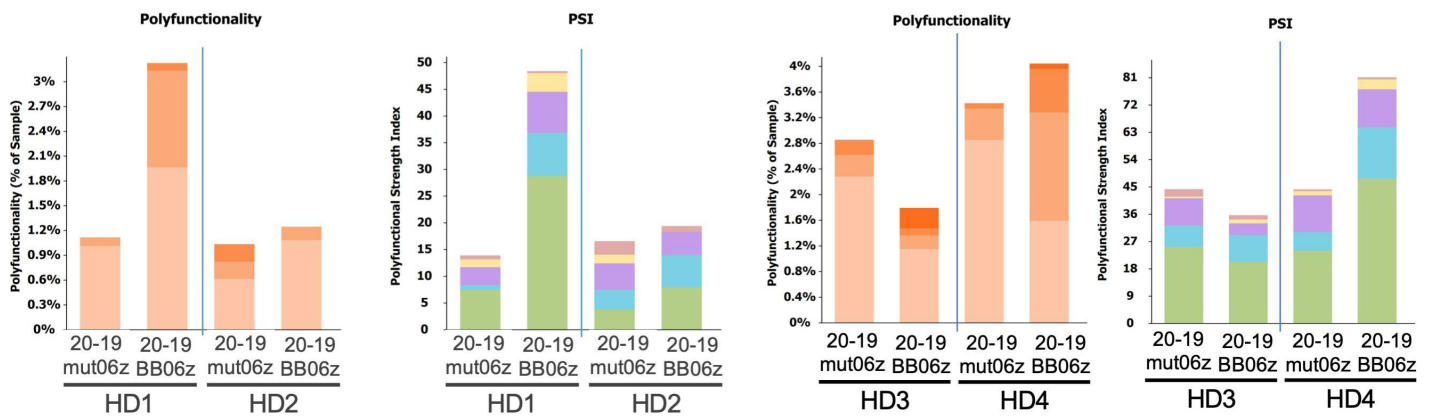

**Key**

- 2 proteins
- 3 proteins
- 4 proteins
- 5+ proteins

**Key**

- Effector**  
*Granzyme B, IFN- $\gamma$ , MIP-1a, Perforin, TNF- $\alpha$ , TNF- $\beta$*
- Stimulatory**  
*GM-CSF, IL-12, IL-15, IL-2, IL-21, IL-5, IL-7, IL-8, IL-9*
- Chemoattractive**  
*CCL-11, IP-10, MIP-1b, RANTES*
- Regulatory**  
*IL-10, IL-13, IL-22, IL-4, sCD137, sCD40L, TGF- $\beta$ 1*
- Inflammatory**  
*IL-17A, IL-17F, IL-1b, IL-6, MCP-1, MCP-4*
